# Supplementary material for: Effect of the Flagellar Gene fliL on the Virulence of Pseudomonas plecoglossicida to Hybrid Grouper (Epinephelus fuscoguttatus ♀ × E. lanceolatus ♂)
Source: MDPI journal article supplement (doi:10.3390/fishes8080397), 2023-08-01
Supplement: s1 [file s1]

Supplementary Materials

# Effect of *fliL* gene on the virulence of *Pseudomonas plecoglossicida*

Lian Shi <sup>1</sup>, Junjie Zhang <sup>2</sup>, Lingmin Zhao <sup>1</sup>, Qi Li <sup>1</sup>, Lixing Huang <sup>1</sup>, Yingxue Qin <sup>1</sup> and Qingpi Yan <sup>1\*</sup>

<sup>1</sup> Fisheries College, Jimei University, Xiamen, Fujian 361021, China;

<sup>2</sup> College of Life Science, Xinjiang Agricultural University, Xinjiang 830052, China.

\* Correspondence: Qingpi Yan. E-mail: yanqp@jmu.edu.cn

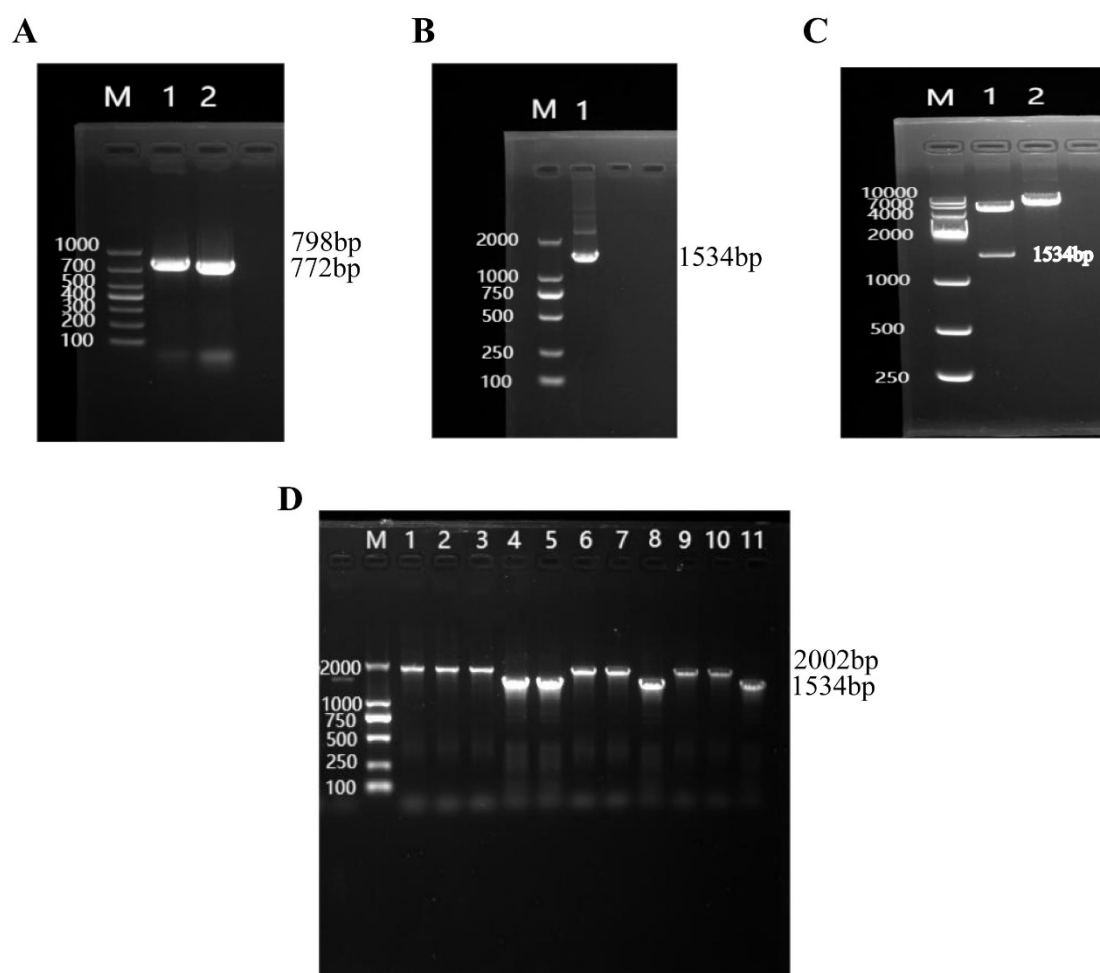

**Figure S1.** Electrophoretic diagram of the construction of the knockout strain. A. Electrophoresis of the left and right homologous arm segment of *fliL* gene in *P. plecoglossicida*; B. Electrophoretic map of gene deletion fragment ( $\Delta fliL$ ); C. Electrophoretic map of recombinant plasmid pK18mobsacB- $\Delta fliL$ ; D. Sucrose screening electrophoresis diagram: Lane 4, 5, 10 and 11 were the mutant that had been successfully knocked out; Lane 1, 2, 3, 6, 7, 8, 9, 10 were the revert mutant (wild type).

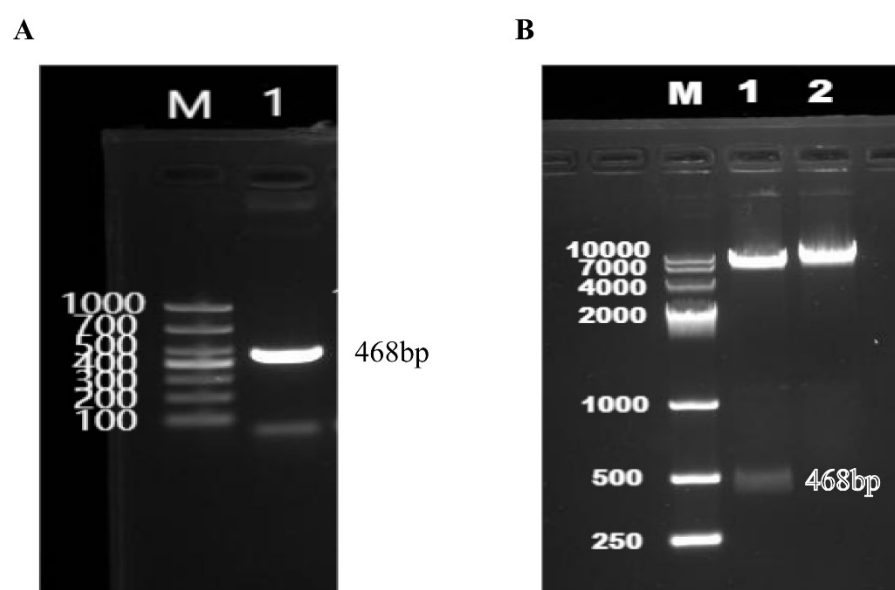

**Figure S2.** Electrophoretic diagram of the construction of the complement strain. A. Electrophoresis of amplification of *fliL* gene complement fragments; B. electrophoretic map of recombinant plasmid pCM130/tac-*fliL*.

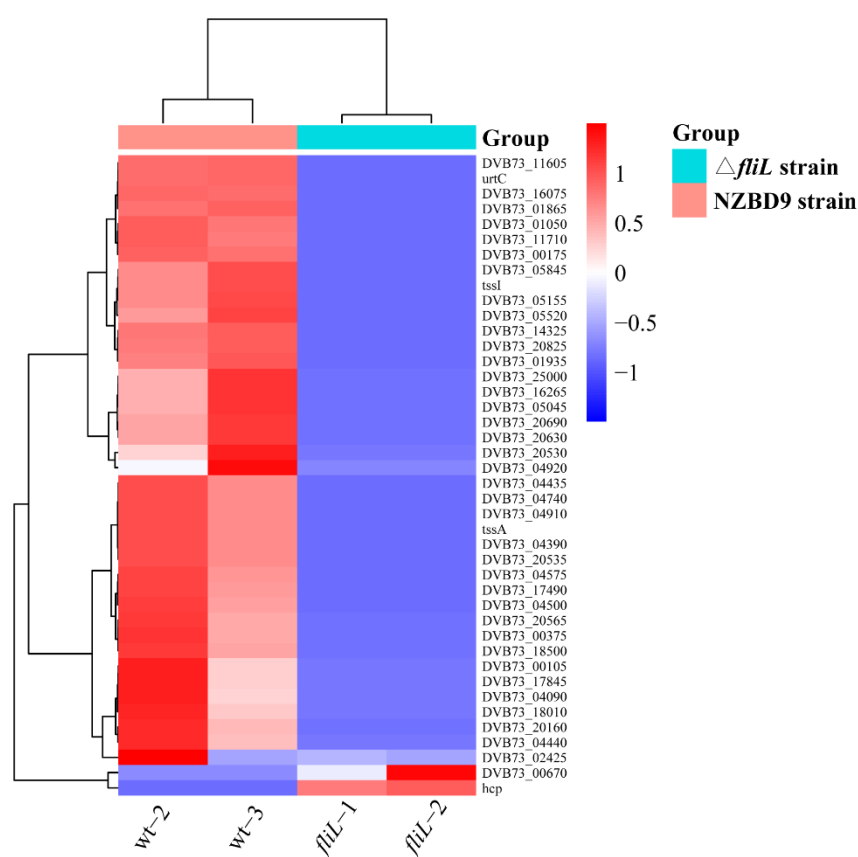

**Figure S3.** Cluster analysis of differentially expressed genes.

**Table S1.** The primers used to construct strains.

| Primers                    | Sequences (5'-3')                     | Size/bp | Restriction site |
|----------------------------|---------------------------------------|---------|------------------|
| P <sub>1</sub>             | CGGAATTCCCCAGCTTGAAACAACG             | 25      | EcoRI            |
| P <sub>2</sub>             | TAGCCACTTGCTGACCAGATGACACGCGATATTGAC  | 36      |                  |
| P <sub>3</sub>             | GTCAATATCGCGTGTCTATCTGGTCAGCAAGTGGCTA | 36      |                  |
| P <sub>4</sub>             | GCTCTAGACACAAGCCTTTTCGATG             | 25      | XbaI             |
| P <sub>5</sub>             | ATGTCAATATCGCGTGTC                    | 18      |                  |
| P <sub>6</sub>             | TTACTGCGCTAGCCACTT                    | 18      |                  |
| C- $\Delta$ <i>fliL</i> -F | GCCAATGCATATGTCAATATCGCGTGTC          | 28      | NsiI             |
| C- $\Delta$ <i>fliL</i> -R | GCTGTACATTACTGCGCTAGCCACT             | 25      | BsrGI            |
| <i>fliL</i> -qRT-F         | CAGGTGGACAAGAACGAGCA                  | 20      |                  |
| <i>fliL</i> -qRT-R         | TATCTGCATTCCCTTGCGCG                  | 20      |                  |
| 16S-qRT-F                  | TTCATCGCCACTGCACCTG                   | 19      |                  |
| 16S-qRT-R                  | GTTCTTGCCCTTCTCCAC                    | 19      |                  |

**Table S2.** Primer sequence for transcriptome validation.

| Gene name   | Primer sequences (5'-3')                         | PCR fragment size(bp) |
|-------------|--------------------------------------------------|-----------------------|
| DVB73_12420 | F-AACCTGCCCTACATCACTGC<br>R-CGGCAACTTCTTTCTGCACC | 220                   |
| DVB73_07040 | F-GCTTCTACCACGATTTCCGC<br>R-GCCAGTTGCTCACGCAGTT  | 121                   |
| hcp         | F-TTCCCAGCGTCAGCATAAGG<br>R-ACCTCCTCTACGCCCTTCTT | 147                   |
| tssE        | F-ATGGTCGCACGCTATGA<br>R-TCGGGTGGCAAGATGTA       | 144                   |
| DVB73_22160 | TCCGTTTCTCGACCTATGCG<br>GTTTCGTGGTCGAGCTTCTGA    | 159                   |
| DVB73_25305 | F-GACCCAGCTTGAAACAAC<br>R-CTGAATGGACACTGATGAC    | 151                   |
| tssA        | F-GGCGGTGCCAAAAGATAT<br>R-TGGTAGACGGGTGACGAAT    | 217                   |
| tssI        | F-ATGGCTCTCACTGTTGGG<br>R-GGTAGGTGTGGCGTTTTT     | 149                   |
| DVB73_04090 | F-CTTCTTGTTCCCTTTTCCGTC<br>R-CCACTCCATCACATCGCT  | 120                   |
| DVB73_19810 | F-GGCCAACGAAAGTCTCCT<br>R-ACCAATACCTTCCACCGC     | 154                   |
